# Supplementary material for: Forecasting the Volatility of Cryptocurrencies in the Presence of COVID-19 with the State Space Model and Kalman Filter
Source: MDPI journal article supplement (doi:10.3390/math10173190), 2022-09-04
Supplement: s1 [file s1]

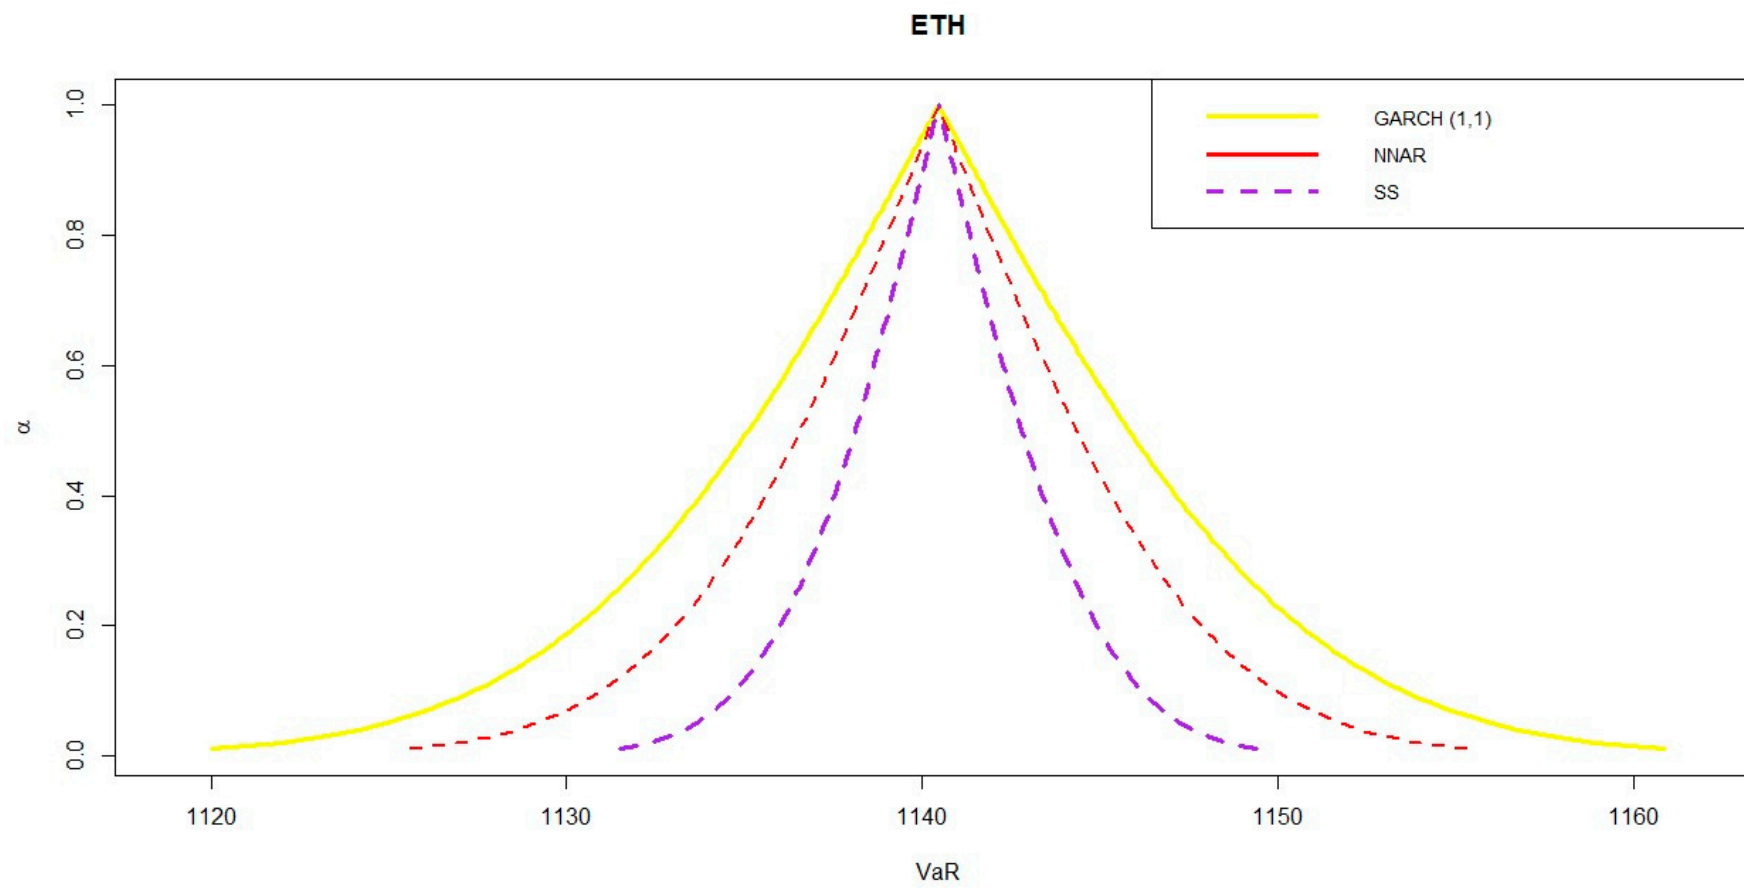

**Figure S1:** VaR confidence interval for Ethereum.

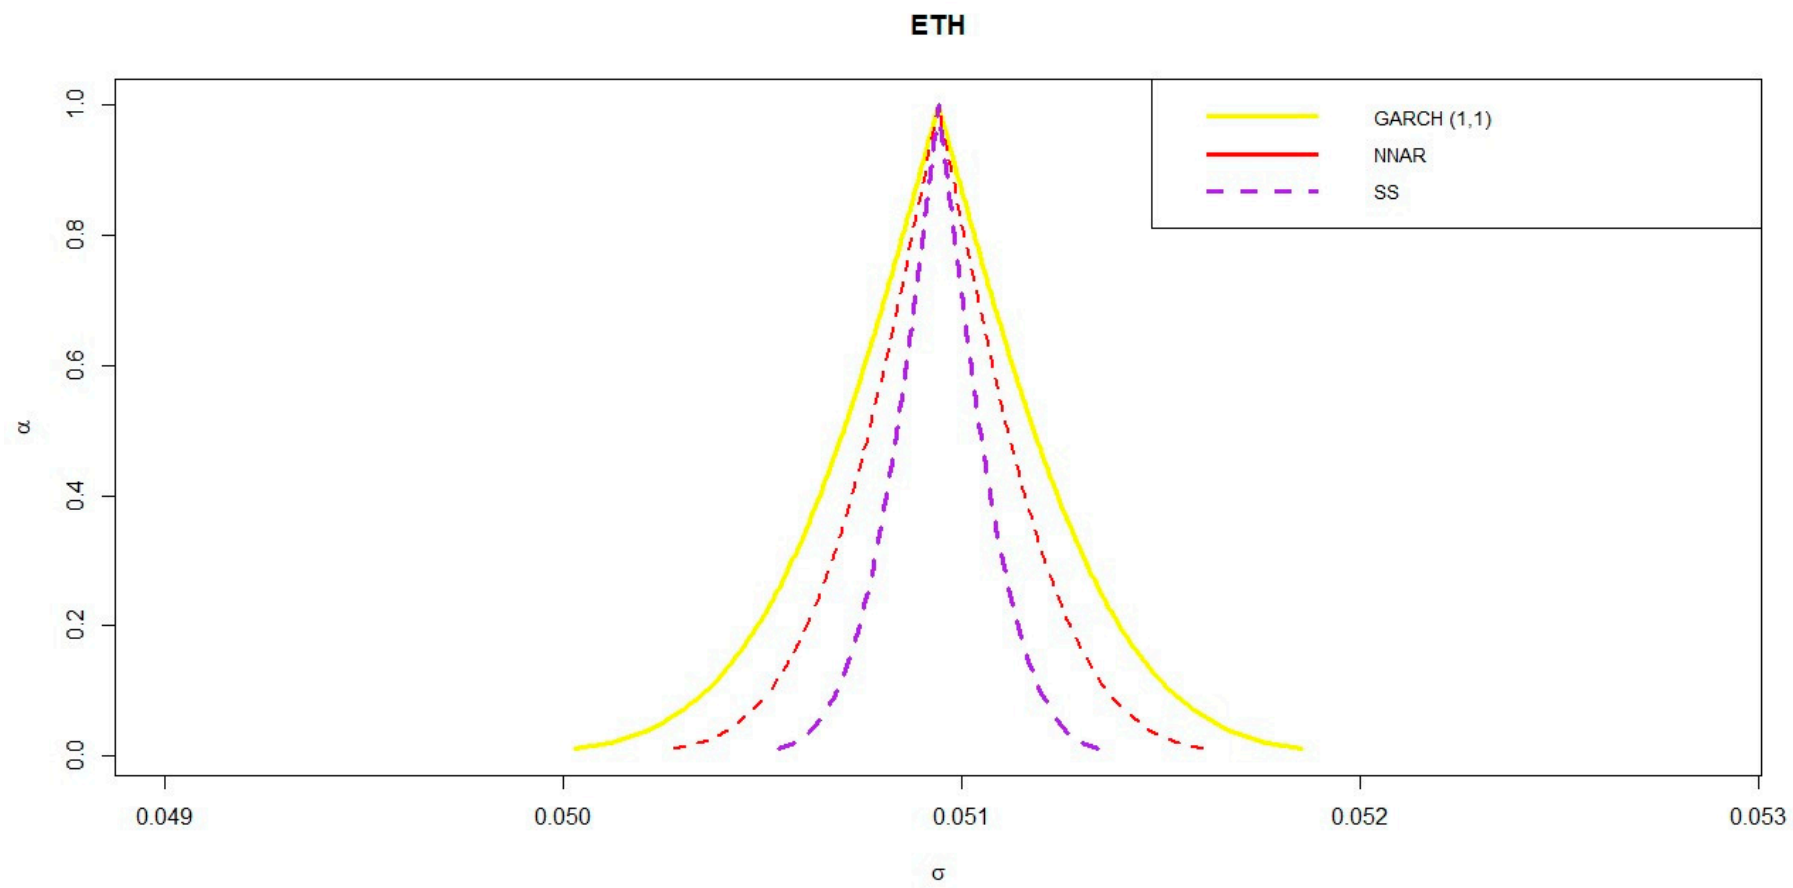

**Figure S2:** Volatility confidence interval for Ethereum.

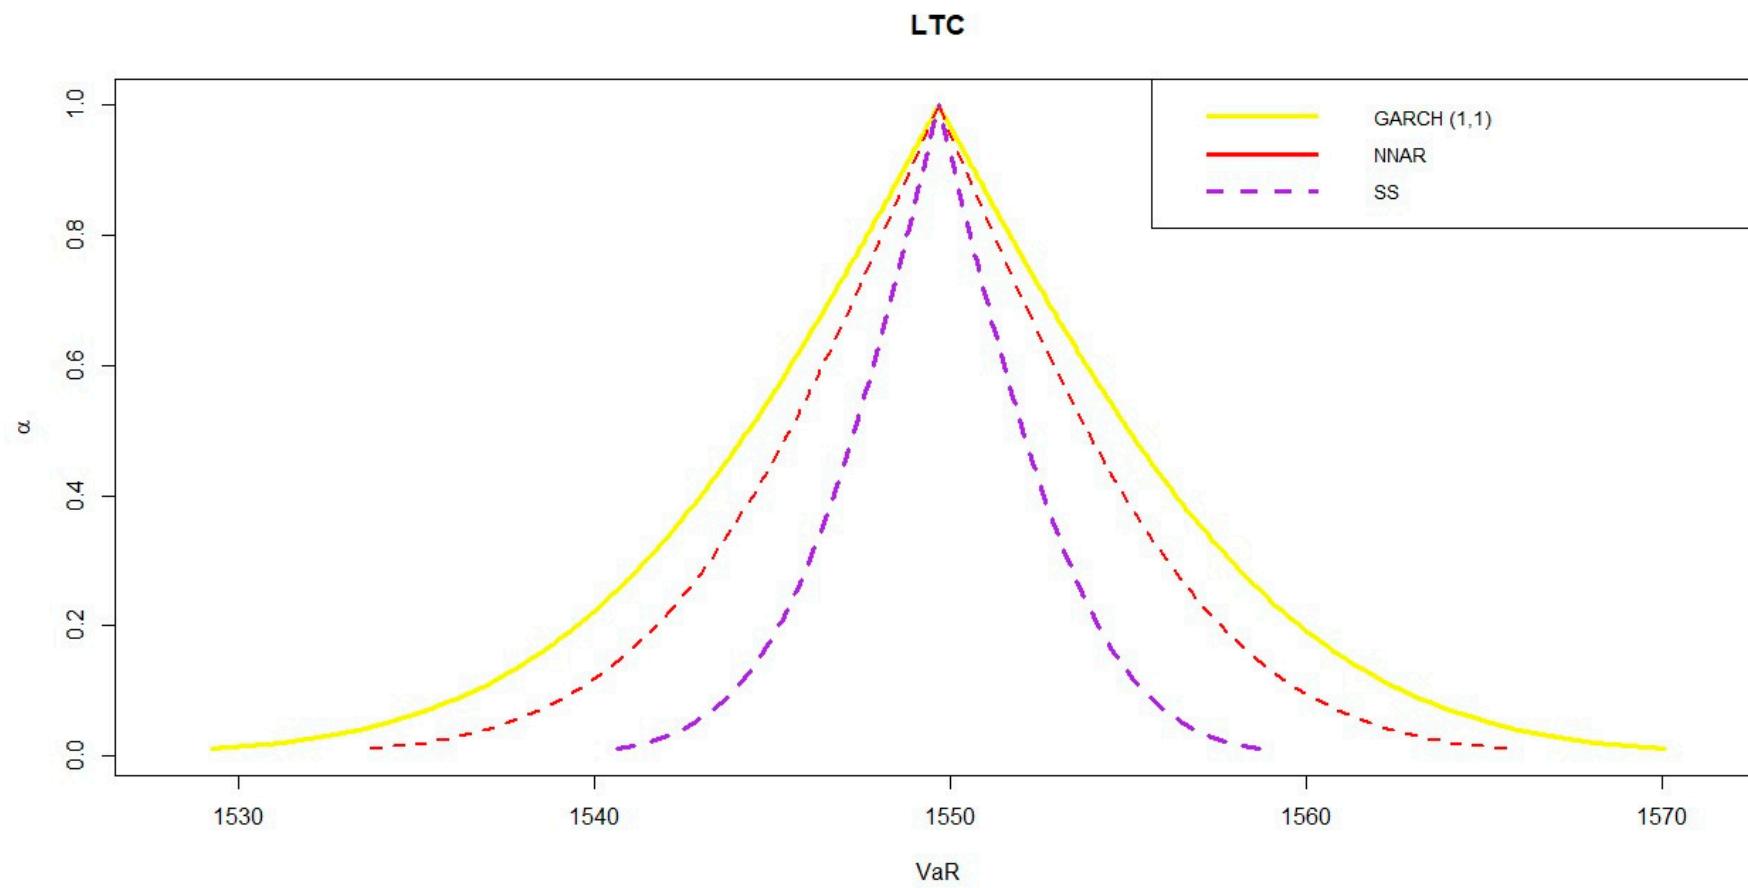

**Figure S3:** VaR confidence interval for Litecoin.

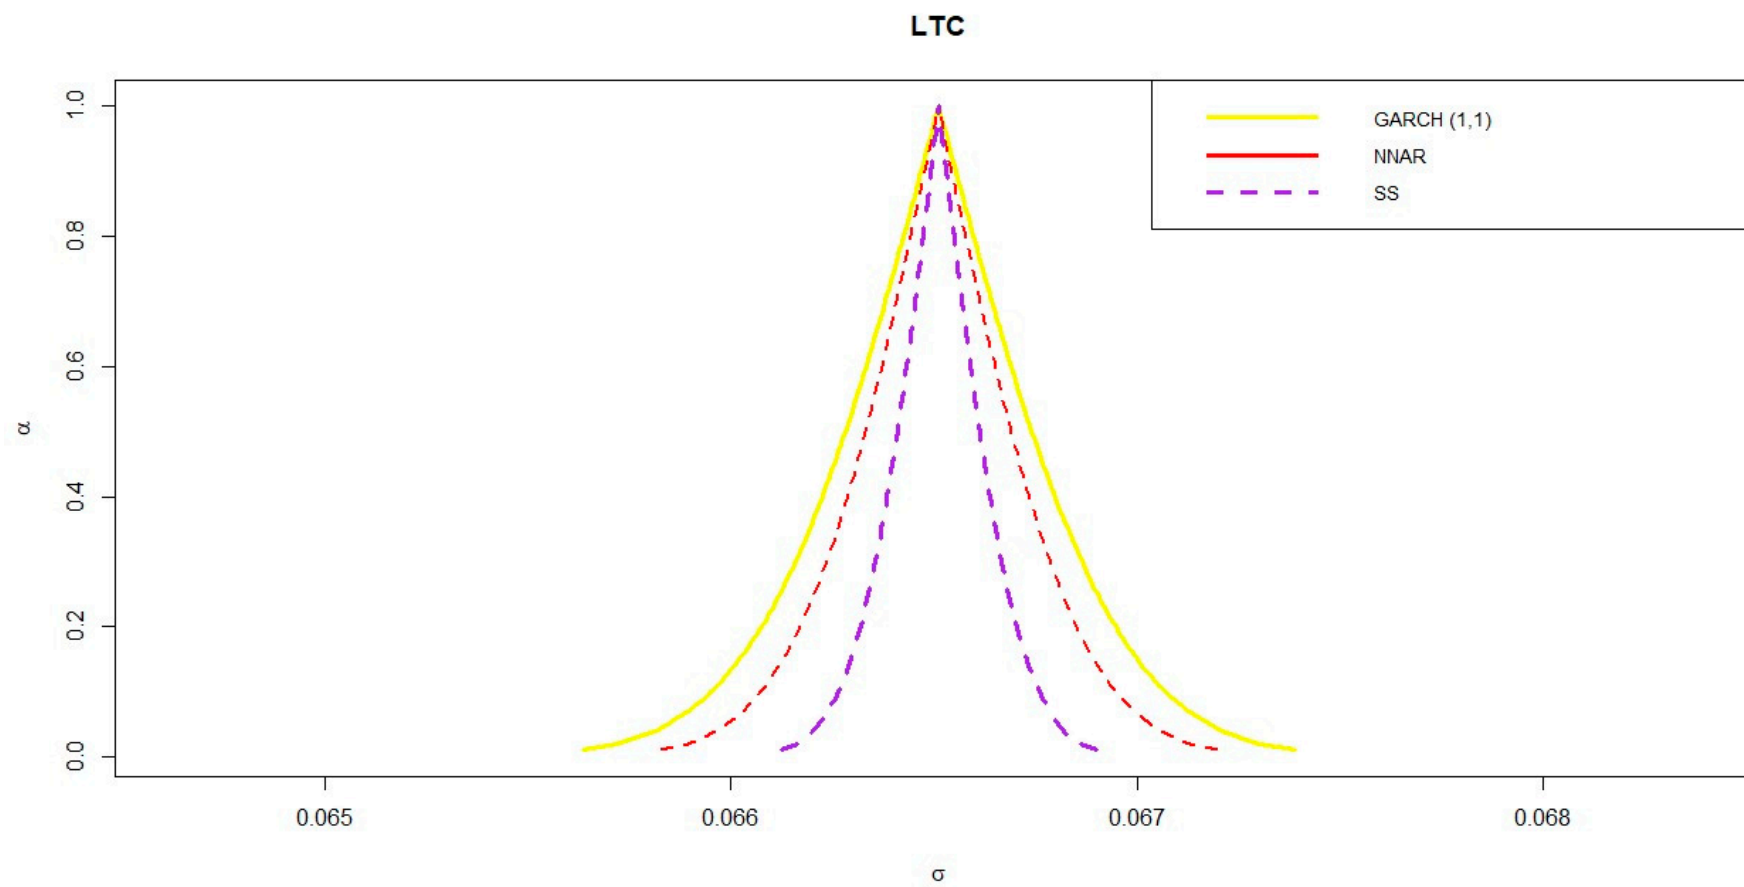

**Figure S4:** Volatility confidence interval for Litecoin.

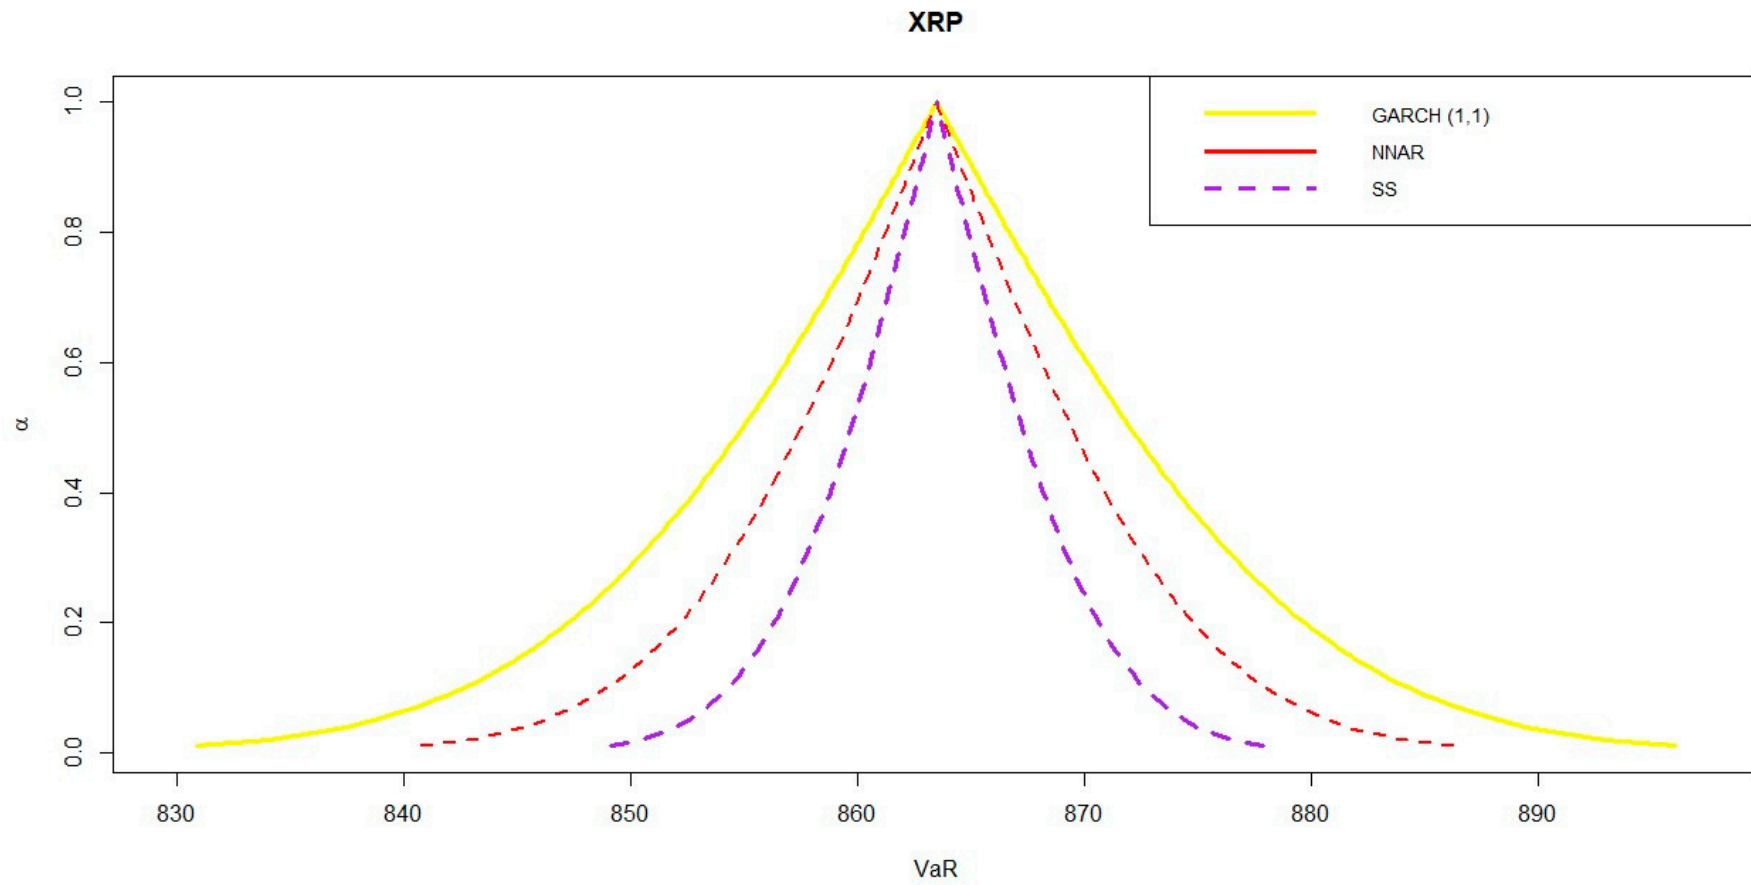

**Figure S5:** VaR confidence interval for Ripple.

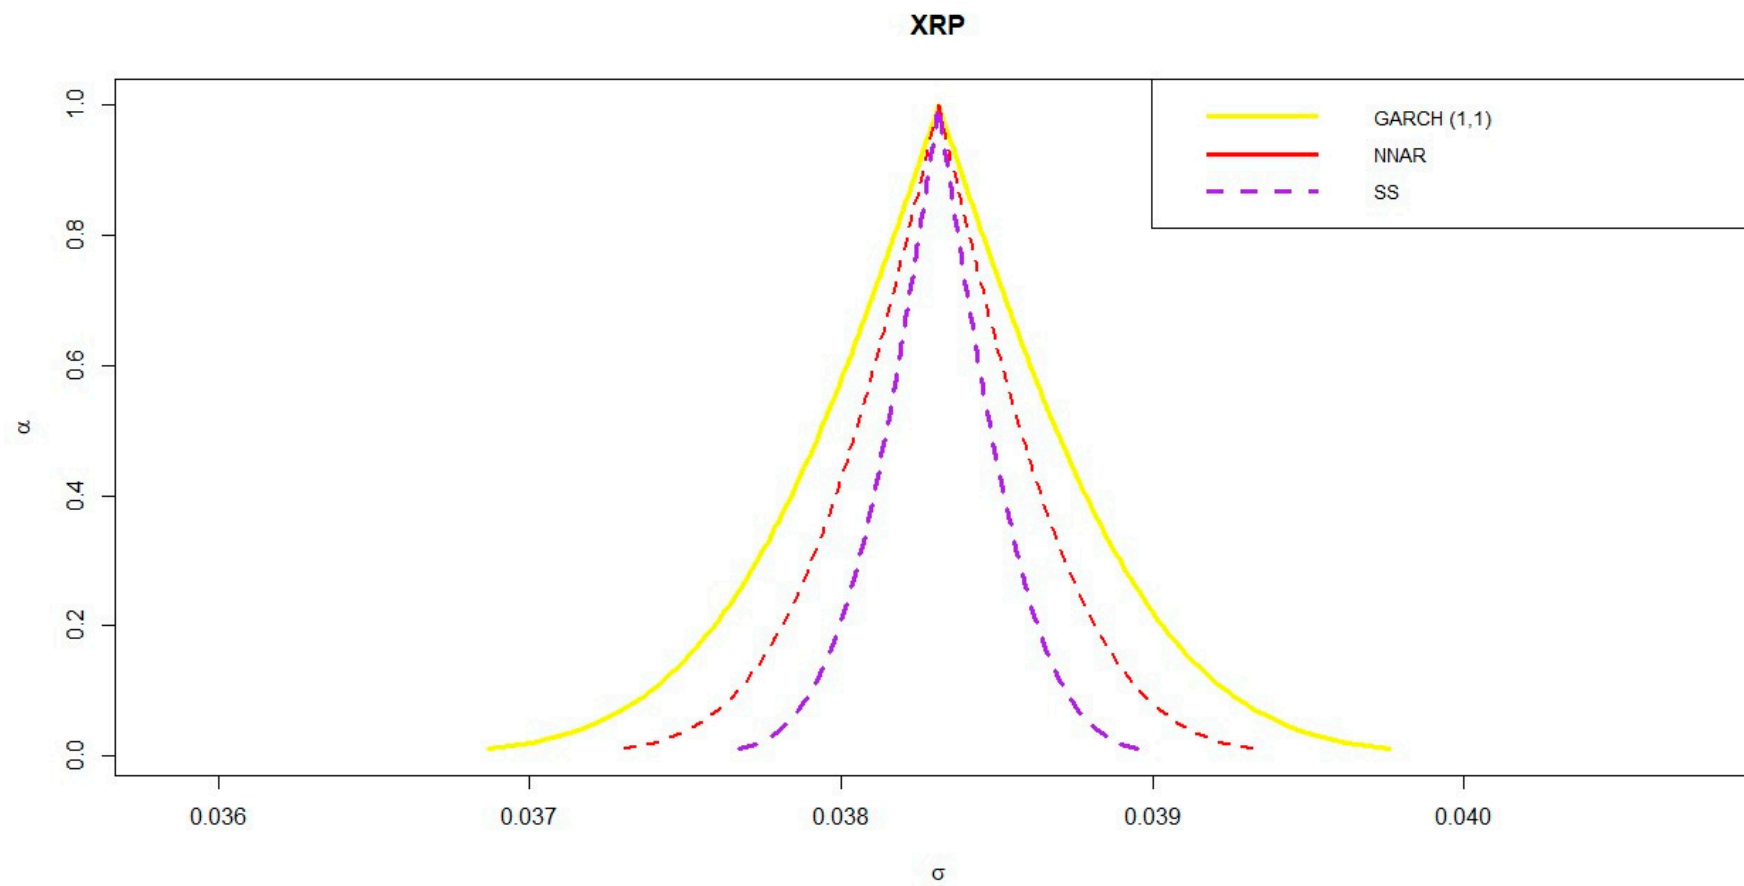

**Figure S6:** Volatility confidence interval for Ripple.

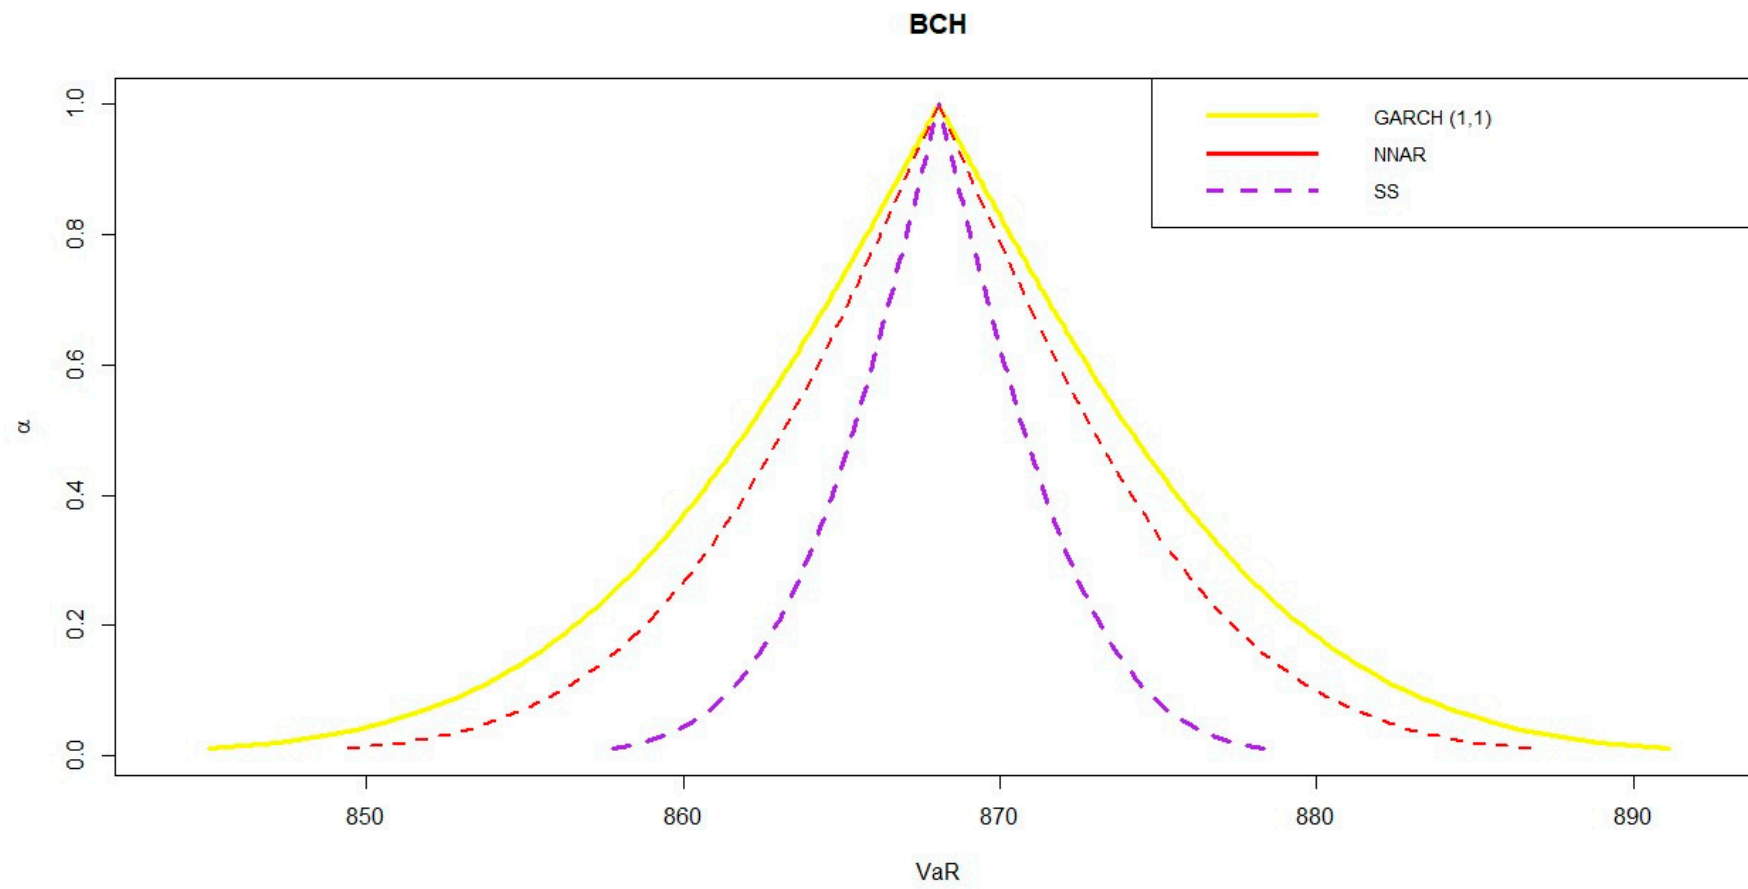

**Figure S7:** VaR confidence interval for Bitcoin Cash.

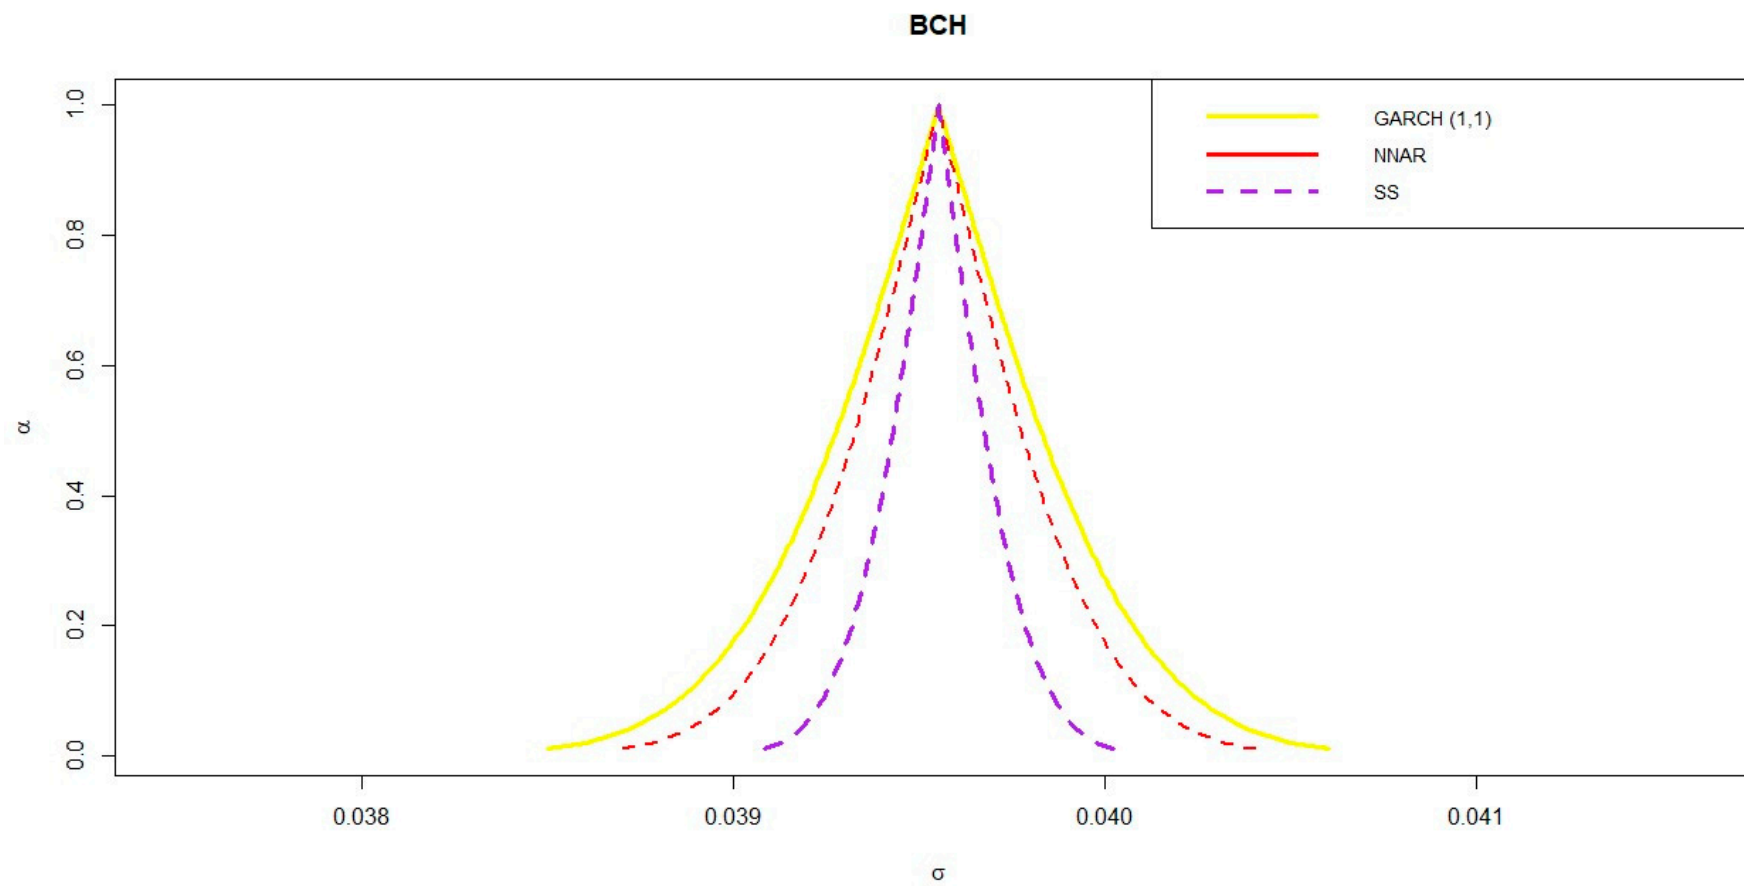

**Figure S8:** Volatility confidence interval for Bitcoin Cash.
