# Supplementary material for: Forecasting the Volatility of Cryptocurrencies in the Presence of COVID-19 with the State Space Model and Kalman Filter
Source: MDPI journal article supplement (doi:10.3390/math10173190), 2022-09-04
Supplement: s1 [file s1]

Archive with 1 entries (1 files):
- mathematics-1880973-supplementary.pdf
